# Supplementary material
Source: PubMed Central journal article supplement (PMC2863226)
Supplement: supp_C110.107375_Table_S1.pdf [file supp_C110.107375_Table_S1.pdf]

Table S1. Primers Used for Quantitative PCR Analysis

| <b>Symbol</b>      | <b>Forward primer</b> | <b>Reverse Primer</b>   |
|--------------------|-----------------------|-------------------------|
| <i>cyclophilin</i> | GGTGGAGAGCACCAAGACAGA | GCCGGAGTCGACAATGATG     |
| <i>fgf21</i>       | CTGGGGGTCTACCAAGCATA  | CACCCAGGATTTGAATGACC    |
| <i>ucp2</i>        | ACTTTCCTCTGGATACCGC   | ACGGAGGCAAAGCTCATCTG    |
| <i>abcb4</i>       | TTTCTTCCTTCAGGGCTTCA  | GTTCCAAGGTTGGCTGTGTT    |
| <i>abdl</i>        | TCTTTCCTCGGAGCATGACA  | GACCTCTCTACTCACTTCTCCAG |
| <i>cpt1a</i>       | CCAGGCTACAGTGGGACATT  | GAACTTGCCCATGTCCTTGT    |
| <i>g6pase</i>      | CGACTCGCTATCTCCAAGTGA | GTTGAACCAGTCTCCGACCA    |
| <i>spot14</i>      | ATGCAAGTGCTAACGAAACGC | CCTGCCATTCTCCCTTGG      |
| <i>fas</i>         | GGTTAACTGTGCTAGGTGTTG | TCCAGGCGCATGAGGCTCAGC   |
| <i>glut4</i>       | CTTCTTTGAGATTGGCCCTGG | AGGTGAAGATGAAGAAGCCAAGC |
