# Supplementary material
Source: PubMed Central journal article supplement (PMC2863226)

Supplemental figure 1

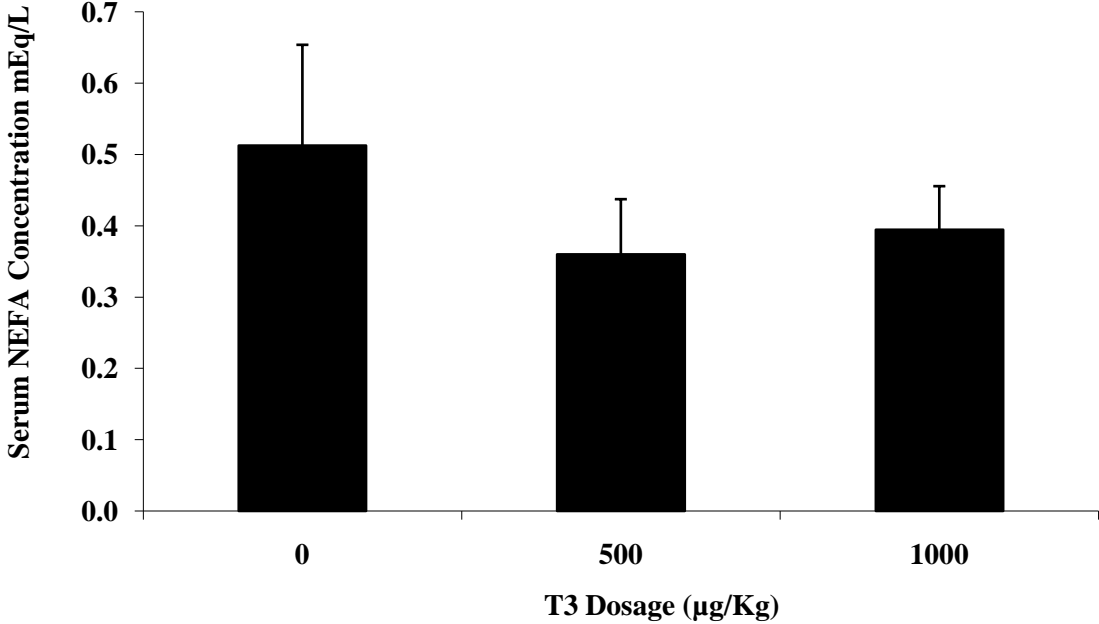

Supplement: supp_C110.107375_jbc.C110.107375-1.pdf [file supp_C110.107375_jbc.C110.107375-1.pdf]
